# Supplementary material
Source: publisher site journal article supplement (https://www.spandidos-publications.com/4090/downloadSupplementary)

Figure S1. Postoperative follow-up image. The patient appeared to have healed uneventfully (white arrowheads).

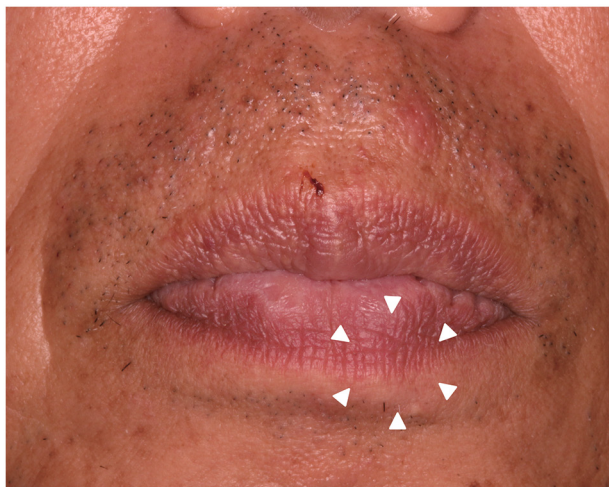

Figure S2. MRI image (nearly 2 years postoperative) showing no evidence of recurrence (white arrow). MRI, magnetic resonance imaging.

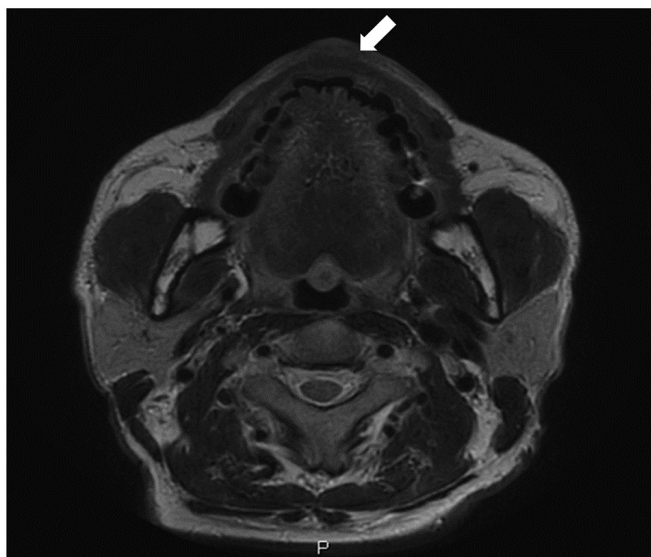

Figure S3. Schema for the inclusion and exclusion criteria of articles for the literature review. CS, chondroid syringoma; PA, pleomorphic adenoma.

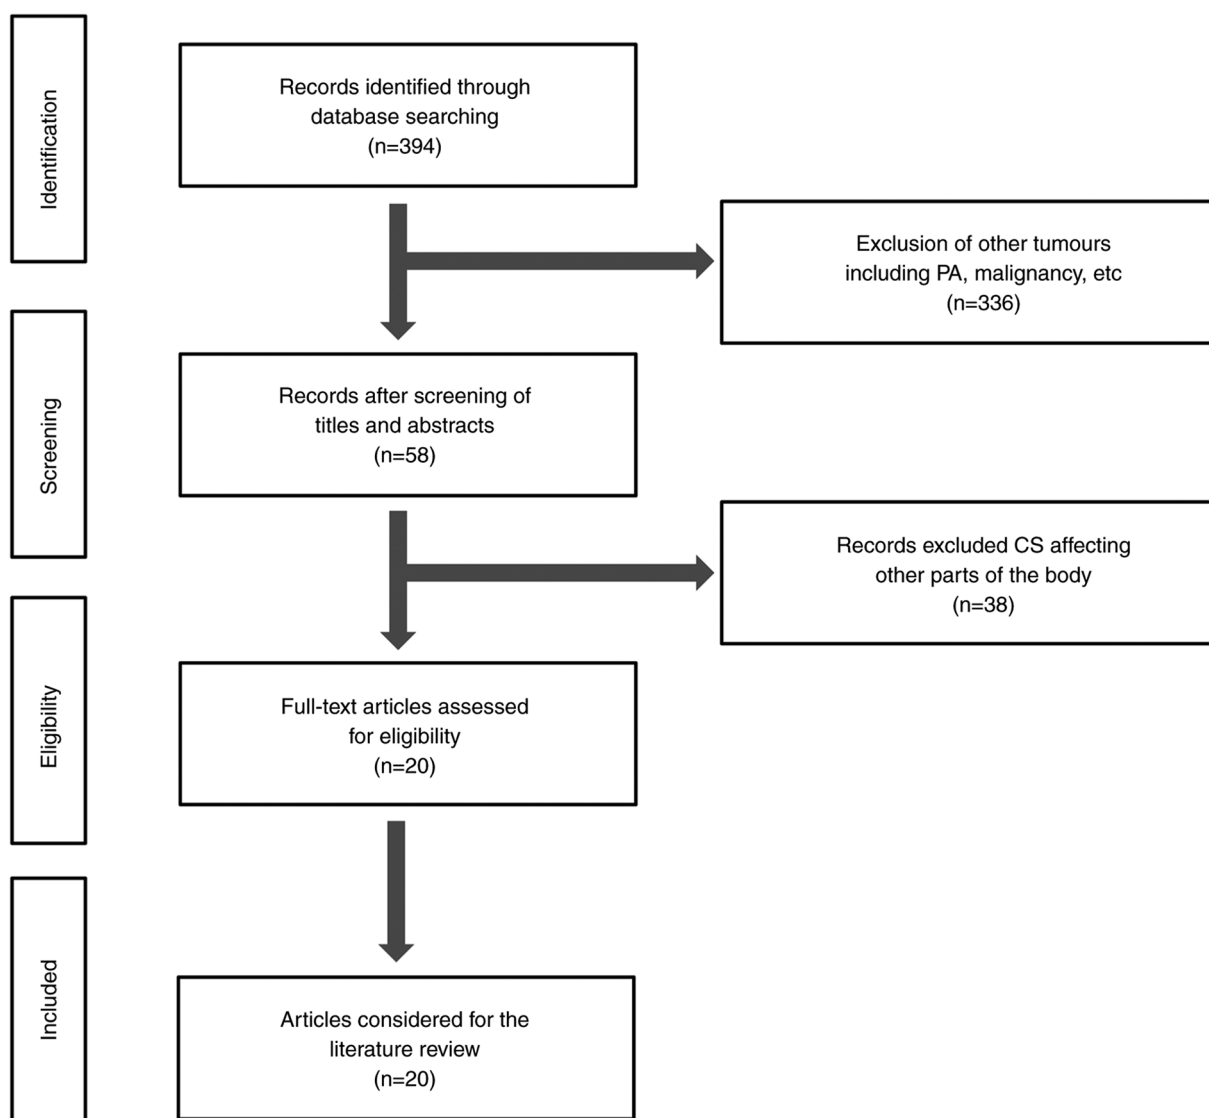

Supplement: Supplementary file 1 [file downloadSupplementary]
